# Supplementary material
Source: PubMed Central journal article supplement (PMC2917900)
Supplement: NIHMS222527-supplement-Appendix_A_Supplementary_Data.pdf [file NIHMS222527-supplement-Appendix_A_Supplementary_Data.pdf]

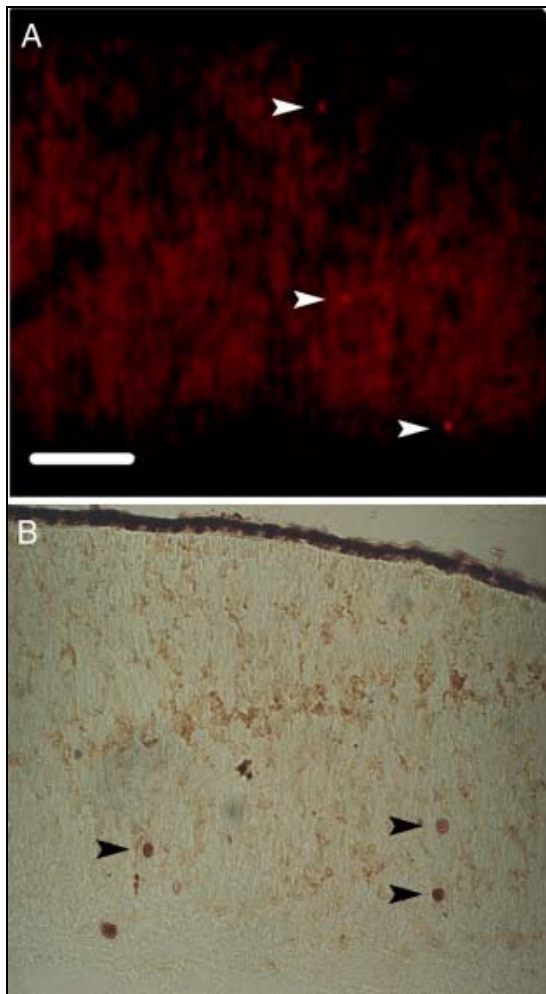

[Full-size image \(61K\)](#)

[High-quality image \(298K\)](#) Supplemental Figure Propidium iodide and TUNEL staining in E8  $\beta$ -gal/GFP and Pax2/GFP retinæ. E3 chick eyes were electroporated with  $\beta$ -gal/GFP or Pax2/GFP and analyzed at E8 for apoptosis by propidium iodide and TUNEL staining. (A) Propidium iodide labeled nuclei (arrows) in  $\beta$ -gal/GFP electroporated eye. (B) TUNEL positive nuclei (arrows) in Pax2/GFP electroporated eye. Scale bar 15  $\mu$ m in A applies to A and B.

 Corresponding author. Fax: +1 317 274 2846.

**Developmental Biology**

Volume 319, Issue 1, 1 July 2008, Pages 23-33

[Home](#) [Browse](#) [Search](#) [My Settings](#) [Alerts](#) [Help](#)

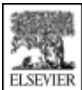

[About ScienceDirect](#) | [Contact Us](#) | [Information for Advertisers](#) | [Terms & Conditions](#) | [Privacy Policy](#)

Copyright © 2010 Elsevier B.V. All rights reserved. ScienceDirect® is a registered trademark of Elsevier B.V.
